# Supplementary material for: MGFM: a novel tool for detection of tissue and cell specific marker genes from microarray gene expression data
Source: PubMed Central journal article supplement (PMC4552366; doi:10.1186/s12864-015-1785-9), 2015-08-28
Supplement: 12864_2015_1785_MOESM1_ESM.pdf [file 12864_2015_1785_MOESM1_ESM.pdf]

## Literature-curated marker genes

### References

- [1] Lan, X., Rai, P., Chandel, N., Cheng, K., Lederman, R., Saleem, M.a., Mathieson, P.W., Husain, M., Crosson, J.T., Gupta, K., Malhotra, A., Singhal, P.C.: Morphine induces albuminuria by compromising podocyte integrity. *PloS one* **8**(3), 55748 (2013). doi:10.1371/journal.pone.0055748
- [2] Kelder, T.P., Penning, M.E., Uh, H.-W., Cohen, D., Bloemenkamp, K.W.M., Bruijn, J.a., Scherjon, S.a., Baelde, H.J.: Quantitative polymerase chain reaction-based analysis of podocyuria is a feasible diagnostic tool in preeclampsia. *Hypertension* **60**(6), 1538–1544 (2012). doi:10.1161/HYPERTENSIONAHA.112.201681
- [3] Song, B., Smink, A.M., Jones, C.V., Callaghan, J.M., Firth, S.D., Bernard, C.a., Laslett, A.L., Kerr, P.G., Ricardo, S.D.: The directed differentiation of human iPS cells into kidney podocytes. *PloS one* **7**(9), 46453 (2012). doi:10.1371/journal.pone.0046453
- [4] Hill, G.S., Karoui, K.E., Karras, A., Mandet, C., Duong Van Huyen, J.-P., Nochy, D., Bruneval, P.: Focal segmental glomerulosclerosis plays a major role in the progression of IgA nephropathy. I. Immunohistochemical studies. *Kidney international* **79**(6), 635–642 (2011). doi:10.1038/ki.2010.466
- [5] Lindgren, D., Boström, A.-K., Nilsson, K., Hansson, J., Sjölund, J., Möller, C., Jirstrom, K., Nilsson, E., Landberg, G., Axelson, H.k., Johansson, M.E.: Isolation and characterization of progenitor-like cells from human renal proximal tubules. *The American journal of pathology* **178**(2), 828–837 (2011). doi:10.1016/j.ajpath.2010.10.026
- [6] Little, M.H., Bertram, J.F.: Is there such a thing as a renal stem cell? *Journal of the American Society of Nephrology : JASN* **20**(10), 2112–2117 (2009). doi:10.1681/ASN.2009010066
- [7] Jászai, J., Farkas, L.M., Fargeas, C.a., Janich, P., Haase, M., Huttner, W.B., Corbeil, D.: Prominin-2 is a novel marker of distal tubules and collecting ducts of the human and murine kidney. *Histochemistry and cell biology* **133**(5), 527–539 (2010). doi:10.1007/s00418-010-0690-1
- [8] Damaraaju, V.L., Elwi, A.N., Hunter, C., Carpenter, P., Santos, C., Barron, G.M., Sun, X., Baldwin, S.A., Young, J.D., Mackey, J.R., Sawyer, M.B., Cass, C.E.: Localization of broadly selective equilibrative and concentrative nucleoside transporters , hENT1 and hCNT3 , in human kidney Localization of broadly selective equilibrative and concentrative nucleoside transporters , hENT1 and hCNT3 , in human kidney (April 2007) (2013). doi:10.1152/ajprenal.00007.2007

## Literature-curated marker genes

| kidney         | Reference     | kidney         | Reference     |
|----------------|---------------|----------------|---------------|
| <i>NPHS1</i>   | [1], [2], [3] | <i>NPHS2</i>   | [1], [2], [3] |
| <i>SYNPO</i>   | [1], [3]      | <i>WT1</i>     | [1], [3], [4] |
| <i>CD2AP</i>   | [1]           | <i>VEGF</i>    | [2], [4]      |
| <i>PAX2</i>    | [3]           | <i>PROM1</i>   | [5]           |
| <i>CD24</i>    | [5]           | <i>AQP1</i>    | [6]           |
| <i>AQP2</i>    | [6]           | <i>CLCNKB</i>  | [6]           |
| <i>PROM2</i>   | [7]           | <i>UMOD</i>    | [8]           |
| <i>PTPRO</i>   | [4]           | <i>ANPEP</i>   | [9]           |
| <i>CYP27B1</i> | [9]           | <i>LRP2</i>    | [9]           |
| <i>ATP1A1</i>  | [9]           | <i>SLC2A1</i>  | [9]           |
| <i>SLC5A10</i> | [9]           | <i>SLC4A4</i>  | [9]           |
| <i>SLCO1B1</i> | [9]           | <i>SLC22A8</i> | [9]           |
| <i>POU2F1</i>  | [9]           | <i>SLC22A5</i> | [9]           |
| <i>ABCB1</i>   | [9]           | <i>SLC15A1</i> | [9]           |
| <i>SLC15A2</i> | [9]           | <i>SLC12A3</i> | [9]           |
| <i>SLC12A1</i> | [9]           | <i>PODXL</i>   | [9]           |
| <i>AQP3</i>    | [9]           | <i>ACE2</i>    | [10]          |
| heart          | Reference     | heart          | Reference     |
| <i>GJA1</i>    | [11]          | <i>MYPN</i>    | [11]          |
| <i>TNNI3</i>   | [11]          | <i>TNNT2</i>   | [11]          |
| <i>DES</i>     | [11]          | <i>MYH7</i>    | [11]          |
| <i>ACTC1</i>   | [11]          | <i>NKX2-5</i>  | [12]          |
| <i>TPM1</i>    | [12]          | <i>ACTN1</i>   | [12]          |
| <i>TPM2</i>    | [12]          | <i>TPM3</i>    | [12]          |
| <i>TPM4</i>    | [12]          | <i>MYL12B</i>  | [13]          |
| <i>ACTN2</i>   | [12]          | <i>ACTN3</i>   | [12]          |
| <i>ACTN4</i>   | [12]          | <i>DDR2</i>    | [12]          |
| <i>NPPA</i>    | [14]          | <i>NPPB</i>    | [15]          |
| <i>ANKRD1</i>  | [16]          | <i>CAV2</i>    | [17]          |
| <i>CAV3</i>    | [18]          | <i>MYL7</i>    | [13]          |
| <i>HAND1</i>   | [19]          | <i>HAND2</i>   | [20]          |
| <i>GATA4</i>   | [19]          | <i>MYH</i>     | [21]          |
| <i>MYL2</i>    | [22]          | <i>FHL2</i>    | [23]          |
| <i>HSPB7</i>   | [24]          | <i>MYOZ2</i>   | [25]          |

| lung             | Reference | lung            | Reference |
|------------------|-----------|-----------------|-----------|
| <i>SFTPD</i>     | [26]      | <i>MUC1</i>     | [26]      |
| <i>SFTPC</i>     | [27]      | <i>LAMP3</i>    | [28]      |
| <i>THY1</i>      | [29]      | <i>AQP5</i>     | [29]      |
| <i>PGC</i>       | [30]      | <i>ICAM1</i>    | [30]      |
| <i>CLDN7</i>     | [30]      | <i>SERPINE1</i> | [30]      |
| <i>ABCA1</i>     | [31]      | <i>CCL2</i>     | [32]      |
| <i>CCR2</i>      | [32]      | <i>GNB2L1</i>   | [33]      |
| <i>MME</i>       | [34]      | <i>TUBB4A</i>   | [35]      |
| <i>KCNA5</i>     | [36]      | <i>CSF1R</i>    | [37]      |
| <i>TMPRSS11D</i> | [38]      | <i>SCGB1A1</i>  | [39]      |
| <i>PDPN</i>      | [40]      | <i>FOXJ1</i>    | [40]      |
| <i>TTF1</i>      | [40]      | <i>KRT14</i>    | [41]      |
| <i>SLURP1</i>    | [42]      |                 |           |

  

| liver         | Reference | liver           | Reference |
|---------------|-----------|-----------------|-----------|
| <i>ALB</i>    | [43],[44] | <i>DPP4</i>     | [43],[45] |
| <i>CYP3A4</i> | [43]      | <i>PCK1CPS1</i> | [43]      |
| <i>CPS1</i>   | [43]      | <i>GJB1</i>     | [43]      |
| <i>TF</i>     | [43]      | <i>KRT18</i>    | [44]      |
| <i>KRT8</i>   | [45]      | <i>VWF</i>      | [46]      |
| <i>TAT</i>    | [47]      | <i>HNF4A</i>    | [48]      |
| <i>TDO2</i>   | [48]      | <i>G6PC</i>     | [48]      |
| <i>FOXA2</i>  | [49]      | <i>HNF1A</i>    | [49]      |

  

| brain          | Reference | brain           | Reference |
|----------------|-----------|-----------------|-----------|
| <i>TH</i>      | [50]      | <i>TUBB3</i>    | [50]      |
| <i>GFAP</i>    | [50]      | <i>PITX3</i>    | [50]      |
| <i>NR4A2</i>   | [50]      | <i>SYT1</i>     | [51]      |
| <i>SYP</i>     | [50]      | <i>KCNJ6</i>    | [52]      |
| <i>SLC6A3</i>  | [52]      | <i>DBH</i>      | [52]      |
| <i>SLC6A4</i>  | [52]      | <i>NES</i>      | [51]      |
| <i>ALDH1A1</i> | [53]      | <i>NCAM1</i>    | [51]      |
| <i>ASCL1</i>   | [54]      | <i>HES6</i>     | [54]      |
| <i>DCX</i>     | [54]      | <i>DLL3TFF3</i> | [54]      |
| <i>TFF3</i>    | [54]      | <i>PITX2</i>    | [54]      |
| <i>DDC</i>     | [54]      | <i>DLL1</i>     | [54]      |
| <i>PINK1</i>   | [54]      | <i>SYN1</i>     | [54]      |
| <i>MAP2</i>    | [51]      | <i>EN1</i>      | [55]      |
| <i>LMX1A</i>   | [55]      | <i>GUCY2C</i>   | [55]      |
| <i>CALB1</i>   | [55]      | <i>SLC18A2</i>  | [55]      |
| <i>UNCX</i>    | [55]      | <i>PBX1</i>     | [55]      |
| <i>NECAB1</i>  | [55]      | <i>C1QL1</i>    | [55]      |
| <i>OTX2</i>    | [51]      |                 |           |

- [9] Narayanan, K., Schumacher, K.M., Tasnim, F., Kandasamy, K., Schumacher, A., Ni, M., Gao, S., Gopalan, B., Zink, D., Ying, J.Y.: Human embryonic stem cells differentiate into functional renal proximal tubular like cells. *Kidney International* **83**(4), 593–603 (2013). doi:10.1038/ki.2012.442
- [10] Soler, M.J., Wysocki, J., Batlle, D.: ACE2 alterations in kidney disease. *Nephrology, dialysis, transplantation : official publication of the European Dialysis and Transplant Association - European Renal Association*, 1–10 (2013). doi:10.1093/ndt/gft320
- [11] Peran, M., Marchal, J.A., Lopez, E., Jimenez-Navarro, M., Boulaiz, H., Rodriguez-Serrano, F., Carrillo, E., Sanchez-Espin, G., De Teresa, E., Tosh, D., Aranega, A.: Human cardiac tissue induces transdifferentiation of adult stem cells towards cardiomyocytes. *Cytotherapy* **12**, 332–337 (2010). doi:10.3109/14653240903548202
- [12] Chun, J.L., O’Brien, R., Song, M.H., Wondrasch, B.F., Berry, S.E.: Injection of vessel-derived stem cells prevents dilated cardiomyopathy and promotes angiogenesis and endogenous cardiac stem cell proliferation in mdx/utrn-/- but not aged mdx mouse models for duchenne muscular dystrophy. *Stem cells translational medicine* **2**(1), 68–80 (2013). doi:10.5966/sctm.2012-0107
- [13] Zhao, P., Ise, H., Hongo, M., Ota, M., Konishi, I., Nikaido, T.: Human amniotic mesenchymal cells have some characteristics of cardiomyocytes. *Transplantation* **79**, 528–535 (2005)
- [14] Kilic, A., Velic, A., Windt, L.J.D., Fabritz, L., Voss, M., Zwiener, M., Baba, H.A., Eickels, M.V., Schlatter, E.: Enhanced Activity of the Myocardial Na / H Exchanger Natriuretic Peptide Receptor Deficient Mice. *Circulation* **112**, 2307–17 (2005). doi:10.1161/CIRCULATIONAHA.105.542209
- [15] He, Q., Mendez, M., LaPointe, M.C.: Regulation of the human brain natriuretic peptide gene by GATA-4. *American Journal of Physiology - Endocrinology And Metabolism* **283**, 50–57 (2002)
- [16] Jeyaseelan, R., Poizat, C., Baker, R.K., Abdishoo, S., Isterabadi, L.B., Lyons, G.E., Kedes, L.: A novel cardiac-restricted target for doxorubicin. CARP, a nuclear modulator of gene expression in cardiac progenitor cells and cardiomyocytes. *The Journal of Biological Chemistry* **272**, 22800–22808 (1997)
- [17] Rybin, V.O., Grabham, P.W., Elouardighi, H., Steinberg, S.F.: Caveolae-associated proteins in cardiomyocytes: caveolin-2 expression and interactions with caveolin-3. *American journal of physiology Heart and circulatory physiology* **285**, 325–332 (2003)
- [18] Sun, J., Picht, E., Ginsburg, K.S., Bers, D.M., Steenbergen, C., Murphy, E.: Hypercontractile female hearts exhibit increased S-nitrosylation of the

- L-type Ca<sup>2+</sup> channel alpha1 subunit and reduced ischemia/reperfusion injury. *Circulation Research* **98**, 403–411 (2006)
- [19] Kodama, H., Hirotani, T., Suzuki, Y., Ogawa, S., Yamazaki, K.: Cardiomyogenic Differentiation in Cardiac Myxoma Expressing Lineage-Specific Transcription Factors. *The American journal of pathology* **161**, 381–389 (2002)
- [20] Zang, M.-X., Li, Y., Xue, L.-X., Jia, H.-T., Jing, H.: Cooperative activation of atrial natriuretic peptide promoter by dHAND and MEF2C. *Journal of Cellular Biochemistry* **93**, 1255–1266 (2004)
- [21] Bin, Z., Sheng, L.-G., Gang, Z.-C., Hong, J., Jun, C., Bo, Y., Hui, S.: Efficient cardiomyocyte differentiation of embryonic stem cells by bone morphogenetic protein-2 combined with visceral endoderm-like cells. *Cell Biology International* **30**, 769–76 (2006). doi:10.1016/j.cellbi.2006.05.011
- [22] Chiavegato, A., Bollini, S., Pozzobon, M., Callegari, A., Gasparotto, L., Taiani, J., Piccoli, M., Lenzini, E., Gerosa, G., Vendramin, I., Cozzi, E., Angelini, A., Iop, L., Zanon, G.F., Atala, A., De Coppi, P., Sartore, S.: Human amniotic fluid-derived stem cells are rejected after transplantation in the myocardium of normal, ischemic, immuno-suppressed or immuno-deficient rat. *Journal of Molecular and Cellular Cardiology* **42**, 746–759 (2007)
- [23] Chan, K.K., Tsui, S.K., Lee, S.M., Luk, S.C., Liew, C.C., Fung, K.P., Waye, M.M., Lee, C.Y.: Molecular cloning and characterization of FHL2, a novel LIM domain protein preferentially expressed in human heart. *Gene* **210**, 345–350 (1998)
- [24] Vos, M.J., Kanon, B., Kampinga, H.H.: HSPB7 is a SC35 speckle resident small heat shock protein. *Biochimica et Biophysica Acta* **1793**, 1343–1353 (2009)
- [25] Frey, N., Richardson, J.A., Olson, E.N.: Calsarcins, a novel family of sarcomeric calcineurin-binding proteins. *Proceedings of the National Academy of Sciences of the United States of America* **97**, 14632–14637 (2000)
- [26] Ichiyasu, H., Ichikado, K., Yamashita, A., Iyonaga, K., Sakamoto, O., Suga, M., Kohrogi, H.: Pneumocyte biomarkers KL-6 and surfactant protein D reflect the distinct findings of high-resolution computed tomography in non-specific interstitial pneumonia. *Respiration; international review of thoracic diseases* **83**(3), 190–197 (2012). doi:10.1159/000326924
- [27] Ma, N., Gai, H., Mei, J., Ding, F.-B., Bao, C.-R., Nguyen, D.M., Zhong, H.: Bone marrow mesenchymal stem cells can differentiate into type II alveolar epithelial cells in vitro. *Cell Biology International* **35**, 1261–6 (2011). doi:10.1042/CBI20110026

- [28] Salaun, B., de Saint-Vis, B., Pacheco, N., Pacheco, Y., Riesler, A., Isaac, S., Leroux, C., Clair-Moninot, V., Pin, J.-J., Griffith, J., Treilleux, I., Goddard, S., Davoust, J., Kleijmeer, M., Lebecque, S.: CD208/dendritic cell-lysosomal associated membrane protein is a marker of normal and transformed type II pneumocytes. *The American journal of pathology* **164**(3), 861–871 (2004). doi:10.1016/S0002-9440(10)63174-4
- [29] Fujino, N., Kubo, H., Suzuki, T., Ota, C., Hegab, A.E., He, M., Suzuki, S., Suzuki, T., Yamada, M., Kondo, T., Kato, H., Yamaya, M.: Isolation of alveolar epithelial type II progenitor cells from adult human lungs. *Laboratory investigation a journal of technical methods and pathology* **91**, 363–378 (2011). doi:10.1038/labinvest.2010.187
- [30] Foster, C.D., Varghese, L.S., Gonzales, L.W., Margulies, S.S., Guttentag, S.H.: The Rho pathway mediates transition to an alveolar type I cell phenotype during static stretch of alveolar type II cells. *Pediatric Research* **67**, 585–590 (2010)
- [31] Bates, S.R., Tao, J.-Q., Yu, K.J., Borok, Z., Crandall, E.D., Collins, H.L., Rothblat, G.H.: Expression and Biological Activity of ABCA1 in Alveolar Epithelial Cells. *American Journal of Respiratory Cell and Molecular Biology* **38**, 283–292 (2008). doi:10.1165/rcmb.2007-0020OC
- [32] Monzon, M.E., Forteza, R.M., Casalino-matsuda, S.M.: MCP-1 / CCR2B-dependent loop upregulates MUC5AC and MUC5B in human airway epithelium. *American Journal of Physiology - Lung Cellular and Molecular Physiology* **300**, 204–215 (2011). doi:10.1152/ajplung.00292.2010.
- [33] Slager, R.E., Devasure, J.M., Pavlik, J.A., Sisson, J.H., Wyatt, T.A.: RACK1, a PKC Targeting Protein, Is Exclusively Localized to Basal Airway Epithelial Cells. *Journal of Histochemistry and Cytochemistry* **56**, 7–14 (2008). doi:10.1369/jhc.7A7249.2007
- [34] Baraniuk, J.N., Ohkubo, K., Kwon, O.J., Mak, J., Ali, M., Davies, R., Twort, C., Kaliner, M., Letarte, M., Barnes, P.J.: Localization of neutral endopeptidase (NEP) mRNA in human bronchi. *The European respiratory journal official journal of the European Society for Clinical Respiratory Physiology* **8**, 1458–1464 (1995)
- [35] Altraja, S., Jaama, J., Altraja, A.: Proteome changes of human bronchial epithelial cells in response to pro-inflammatory mediator leukotriene E4 and pro-remodelling factor TGF-beta1. *Journal of proteomics* **73**, 1230–1240 (2010)
- [36] Park, S.-A., Lee, Y.-C., Ma, T.-Z., Park, J.-A., Han, M.-K., Lee, H.-H., Kim, H.-G., Kwak, Y.-G.: hKv1.5 channels play a pivotal role in the functions of human alveolar macrophages. *Biochemical and Biophysical Research Communications* **346**, 567–571 (2006)

- [37] Bonfield, T.L., Raychaudhuri, B., Malur, A., Abraham, S., Trapnell, B.C., Kavuru, M.S., Thomassen, M.J.: PU.1 regulation of human alveolar macrophage differentiation requires granulocyte-macrophage colony-stimulating factor. *American journal of physiology Lung cellular and molecular physiology* **285**, 1132–1136 (2003)
- [38] Beaufort, N., Leduc, D., Eguchi, H., Mengele, K., Hellmann, D., Masegi, T., Kamimura, T., Yasuoka, S., Fend, F., Chignard, M., Pidard, D.: The human airway trypsin-like protease modulates the urokinase receptor (uPAR, CD87) structure and functions. *American journal of physiology Lung cellular and molecular physiology* **292**, 1263–1272 (2007)
- [39] Peri, A., Cordella-Miele, E., Miele, L., Mukherjee, A.B.: Tissue-specific expression of the gene coding for human Clara cell 10-kD protein, a phospholipase A2-inhibitory protein. *The Journal of clinical investigation* **92**(5), 2099–109 (1993). doi:10.1172/JCI116810
- [40] Besnard, V., Wert, S.E., Kaestner, K.H., Whitsett, J.A.: Stage-specific regulation of respiratory epithelial cell differentiation by Foxa1. *American journal of physiology Lung cellular and molecular physiology* **289**, 750–759 (2005)
- [41] Bals, R., Welsch, U.: Lectins and antibodies to blood group antigens as markers for the basal cells of the human respiratory epithelium. *Microscopy Research and Technique* **38**, 505–511 (1997)
- [42] Horiguchi, K., Horiguchi, S., Yamashita, N., Irie, K., Masuda, J., Takano-Ohmuro, H., Himi, T., Miyazawa, M., Moriwaki, Y., Okuda, T., Misawa, H., Ozaki, H., Kawashima, K.: Expression of SLURP-1, an endogenous alpha7 nicotinic acetylcholine receptor allosteric ligand, in murine bronchial epithelial cells. *Journal of Neuroscience Research* **87**, 2740–2747 (2009)
- [43] Aurich, H., Sgodda, M., Kaltwasser, P., Vetter, M., Weise, a., Liehr, T., Brulport, M., Hengstler, J.G., Dollinger, M.M., Fleig, W.E., Christ, B.: Hepatocyte differentiation of mesenchymal stem cells from human adipose tissue in vitro promotes hepatic integration in vivo. *Gut* **58**(4), 570–581 (2009). doi:10.1136/gut.2008.154880
- [44] Weiss, T.S., Lichtenauer, M., Kirchner, S., Stock, P., Aurich, H., Christ, B., Brockhoff, G., Kunz-Schughart, L.A., Jauch, K.-W., Schlitt, H.-J., Thasler, W.E.: Hepatic progenitor cells from adult human livers for cell transplantation. *Gut* **57**, 1129–1138 (2008)
- [45] Sana, G., Lombard, C., Vosters, O., Jazouli, N., Andre, F., Stephenne, X., Smets, F., Najimi, M., Sokal, E.M.: Adult human hepatocytes promote CD4+ T cell hyporesponsiveness via interleukin-10 producing allogeneic dendritic cells. *Cell transplantation*, 1–38 (2013). doi:10.3727/096368913X666421

- [46] Gerlach, J.C., Over, P., Turner, M.E., Thompson, R.L., Foka, H.G., Chen, W.C.W., Péault, B., Gridelli, B., Schmelzer, E.: Perivascular mesenchymal progenitors in human fetal and adult liver. *Stem cells and development* **21**(18), 3258–3269 (2012). doi:10.1089/scd.2012.0296
- [47] Liang, X.J., Chen, X.J., Yang, D.H., Huang, S.M., Sun, G.D., Chen, Y.P.: Differentiation of human umbilical cord mesenchymal stem cells into hepatocyte-like cells by hTERT gene transfection in vitro. *Cell Biol Int* **36**, 215–221 (2012)
- [48] Maerckx, C., Scheers, I., Tondreau, T., Campard, D., Nyabi, O., Najimi, M., Sokal, E.: Hepato-biliary profile of potential candidate liver progenitor cells from healthy rat liver. *World journal of gastroenterology WJG* **18**, 3511–9 (2012). doi:10.3748/wjg.v18.i27.3511
- [49] Cho, J.-w., Lee, C.-y., Ko, Y.: Therapeutic potential of mesenchymal stem cells overexpressing human forkhead box A2 gene in the regeneration of damaged liver tissues. *Journal of Gastroenterology and Hepatology* **27**, 1362–1370 (2012). doi:10.1111/j.1440-1746.2012.07137.x
- [50] Daadi, M.M., Grueter, B.a., Malenka, R.C., Redmond, D.E., Steinberg, G.K.: Dopaminergic neurons from midbrain-specified human embryonic stem cell-derived neural stem cells engrafted in a monkey model of Parkinson’s disease. *PloS one* **7**(7), 41120 (2012). doi:10.1371/journal.pone.0041120
- [51] Pruszak, J., Sonntag, K.-C., Aung, M.H., Sanchez-Pernaute, R., Isacson, O.: Markers and methods for cell sorting of human embryonic stem cell-derived neural cell populations. *Stem Cells* **25**, 2257–2268 (2007)
- [52] Sanchez-Danes, A., Consiglio, A., Richaud, Y., Rodriguez-Piza, I., Dehay, B., Edel, M., Bove, J., Memo, M., Vila, M., Raya, A., Izpisua Belmonte, J.C.: EFFICIENT GENERATION OF A9 MIDBRAIN DOPAMINERGIC NEURONS BY LENTIVIRAL DELIVERY OF LMX1A IN HUMAN EMBRYONIC STEM CELLS AND iPS CELLS. *Human Gene Therapy* **23**, 56–69 (2011). doi:10.1089/hum.2011.054
- [53] Decressac, M., Mattsson, B., Weikop, P., Lundblad, M., Jakobsson, J., Björklund, A.: TFEB-mediated autophagy rescues midbrain dopamine neurons from  $\alpha$ -synuclein toxicity. *Proceedings of the National Academy of Sciences of the United States of America* (2013). doi:10.1073/pnas.1305623110
- [54] Kriks, S., Shim, J.-W., Piao, J., Ganat, Y.M., Wakeman, D.R., Xie, Z., Carrillo-Reid, L., Auyeung, G., Antonacci, C., Buch, A., Yang, L., Beal, M.F., Surmeier, D.J., Kordower, J.H., Tabar, V., Studer, L.: Dopamine neurons derived from human ES cells efficiently engraft in animal models of Parkinsons disease. *Nature* **480**, 0–6 (2011). doi:10.1038/nature10648



- [55] Ganat, Y.M., Calder, E.L., Kriks, S., Nelander, J., Tu, E.Y., Jia, F., Battista, D., Harrison, N., Parmar, M., Tomishima, M.J., Rutishauser, U., Studer, L.: Identification of embryonic stem cell-derived midbrain dopaminergic neurons for engraftment. *J Clin Invest* **122**, 2928–2939 (2012)
