# Supplementary material for: MGFM: a novel tool for detection of tissue and cell specific marker genes from microarray gene expression data
Source: PubMed Central journal article supplement (PMC4552366; doi:10.1186/s12864-015-1785-9), 2015-08-28
Supplement: 12864_2015_1785_MOESM2_ESM.pdf [file 12864_2015_1785_MOESM2_ESM.pdf]

## Plots of Precision/Recall comparing our method to $t$ -test

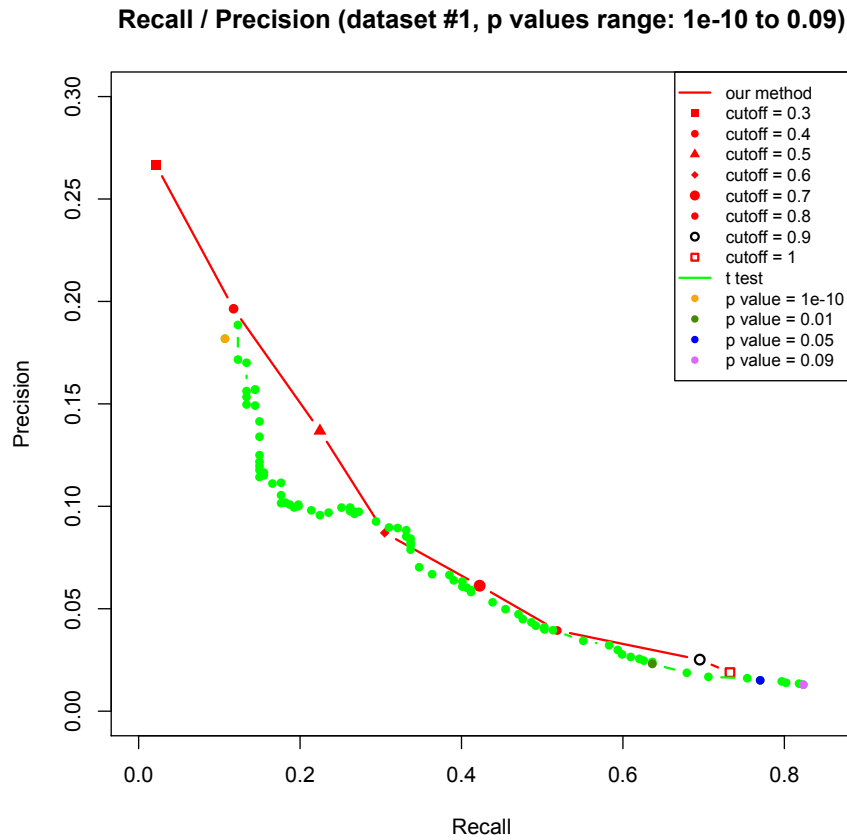

**Figure 1:** Comparison of Precision/Recall for the complete set of genes selected by our tool and  $t$ -test as potential markers for the examined tissues using data set #1.

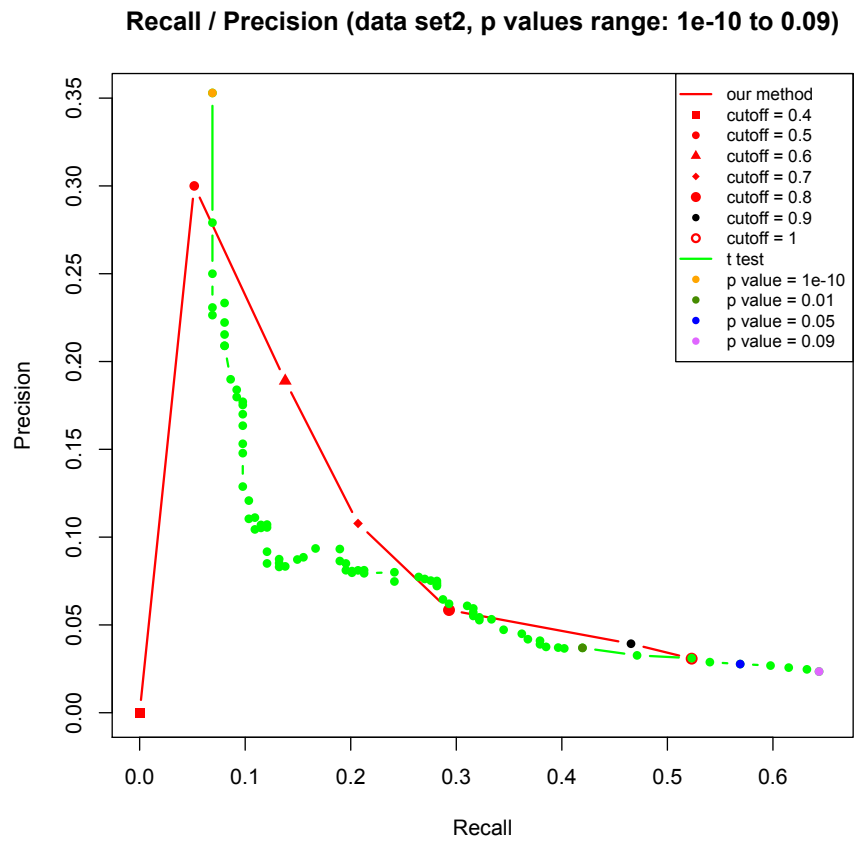

**Figure 2:** Comparison of Precision/Recall for the complete set of genes selected by our tool and *t*-test as potential markers for the examined tissues using data set #2.
