# Supplementary material for: MGFM: a novel tool for detection of tissue and cell specific marker genes from microarray gene expression data
Source: PubMed Central journal article supplement (PMC4552366; doi:10.1186/s12864-015-1785-9), 2015-08-28
Supplement: 12864_2015_1785_MOESM5_ESM.pdf [file 12864_2015_1785_MOESM5_ESM.pdf]

## Primer Sequences for PCR amplification

### Primers used for liver

| Gene name       | forward primer (5'-3') | Reverse primer (3'-5') | Product size |
|-----------------|------------------------|------------------------|--------------|
| <i>AKR1D1</i>   | TCTCAGTGCTGCAAGTCACC   | CTCCCCAACTTCGTGTTTCAT  | 193          |
| <i>FGG</i>      | GAATTTTGGCTGGGAAATGA   | ATCATCGCCAAAATCAAAGC   | 222          |
| <i>APOA2</i>    | GAGCTTTGGTTCGGAGACAG   | TGTGTTCCAAGTTCACGAA    | 235          |
| <i>CYP2C8</i>   | GCAGGAAAAGGACAACCCAAA  | GTGTAAGGCATGTGGCTCCT   | 228          |
| <i>GC</i>       | GAAACACCAGCCACAGGAAT   | GGTACAGCAGGACCCTACCA   | 196          |
| <i>CPS1</i>     | ATTCTTTGGTGTGGCTGAAC   | ATGGAAGAGAGGCTGGGATT   | 150          |
| <i>CYP2E1</i>   | ACCCGAGACACCATTTTCAG   | TCCAGCACACACTCGTTTTTC  | 201          |
| <i>APOC3</i>    | CTCCCTTCTCAGCTTCATGC   | GTCTGACCTCAGGGTCCAAA   | 200          |
| <i>SERPINC1</i> | TTTACTTCAAGGGCCTGTGG   | CTTTGAAGGGCAACTCAAGC   | 171          |
| <i>AHSG</i>     | CAGAACAACGGCTCCAATTT   | CTGTGTTTGGAAACACCATGC  | 240          |
| <i>AMBP</i>     | AGTGGTACAACCTGGCCATC   | AAGCTCCAGACGTCTCCTCA   | 165          |

### Primers used for lung

| Gene name      | forward primer (5'-3') | Reverse primer (3'-5') | Product size |
|----------------|------------------------|------------------------|--------------|
| <i>CLDN18</i>  | GGTATCCATCTTTGCCCTGA   | GGTCTGAACAGTCTGCACCA   | 217          |
| <i>NKX2-1</i>  | ACAAGAAAGTGGGCATGGAG   | GTTCCCTCATGGTGTCCCTGGT | 248          |
| <i>SCGB1A1</i> | GTCACACTGGCTCTCTGCTG   | TGATGCTTTCTCTGGGCTTT   | 205          |
| <i>SFTPB</i>   | CAAACGGCATCTGTATGCAC   | CGGAGAGATCCTGTGTGTGA   | 195          |
| <i>CYP4B1</i>  | CCTGGACAAAGTGGTGTCCCT  | CCAATCCACTGGAGGAAGAA   | 171          |
| <i>CD52</i>    | GCGCTTCCTCTTCCTCCTAC   | GAGGTGGATTATGGCATTGG   | 166          |
| <i>LAMP3</i>   | ACTTCAACATCGACCCCAAC   | CACTCACGCACCTGAAGGAA   | 246          |
| <i>AGER</i>    | GCTGTCAGCATCAGCATCAT   | ATTCAGTTCCTGCACGCTCCT  | 225          |
| <i>LYZ</i>     | GCCAAATGGGAGAGTGGTTA   | ATCACGGACAACCCTCTTTG   | 213          |
| <i>SFTPD</i>   | AAGTGGGCTTCCAGATGTTG   | CTGTGCCTCCGTAAATGGTT   | 181          |
| <i>SFTPC</i>   | ACACTGCCACCTTCTCCATC   | CTGGCCCAGCTTAGACGTAG   | 221          |
| <i>SLC34A2</i> | TCGCCACTGTATCAAGAAG    | TGGATAAGCCCTCTCAATGG   | 185          |

### Primers used for heart

| Gene name      | forward primer (5'-3')  | Reverse primer (3'-5')  | Product size |
|----------------|-------------------------|-------------------------|--------------|
| <i>MYOZ2</i>   | CCGGAGCTTTTAGAGGCTTT    | CCAGAAAGGGGATTGACAAA    | 206          |
| <i>TNNI3</i>   | TGCAGATTGCAAAGCAAGAG    | CAGATCTGCAATCTCCGTGA    | 224          |
| <i>SYNPO2L</i> | CGACCTGGTCCTCATCTCAT    | GCCGCCGTTTCTTAAACATA    | 232          |
| <i>MYH6</i>    | CTTCAACCACCACATGTTTCG   | GGCTTCTGGAAATTGTTGGA    | 234          |
| <i>CSRP3</i>   | CCTTGGCACAAGACCTGTTT    | TTGTGTAAGGCCTCCAAACC    | 150          |
| <i>CKM</i>     | TGAAAACCTCAAGGGTGGAG    | TCCTTCTCCGTATGCTCTT     | 213          |
| <i>PLN</i>     | GAGAAAGTCCAATACCTCACTCG | GAGAAGCATCACGATGATACAGA | 153          |
| <i>MB</i>      | GAGATGAAGGCGTCTGAGGA    | TCTGCAGAACCTGGATGATG    | 190          |
| <i>ITN</i>     | AGGCTGGAAACGGTGTAAATG   | TAGGGCATCCTGCTCTCATG    | 233          |
| <i>MYL7</i>    | GTCTTCCTCACGCTCTTTGG    | CCACCTCAGCTGGAGAGAAC    | 166          |
| <i>MYH7</i>    | TGTGTCAACCGTCAAACCTTA   | TGGCTGCAATAACAGCAAAG    | 238          |
| <i>TPM1</i>    | AGTCGAGCCCAAAAAGATGA    | TTCTTCCAGCTGTCTGGACTT   | 192          |

**Primers used for brain**

| <b>Gene name</b> | <b>forward primer (5'-3')</b> | <b>Reverse primer (3'-5')</b> | <b>Product size</b> |
|------------------|-------------------------------|-------------------------------|---------------------|
| <i>GAP43</i>     | GGGAGGCTTGAGGAAAAATC          | TCAGCAGCTTGGACATCATC          | 240                 |
| <i>GFAP</i>      | AGGAAGATTGAGTCGCTGGA          | ATACTGCGTGCCGATCTCTT          | 165                 |
| <i>TMEFF1</i>    | CCCTGTTTTGTTTCGAGAAGC         | CACATTTTCCATGGATGCAG          | 229                 |
| <i>FUT9</i>      | CAAAAGAGTGGCATTGAGCA          | AATGCTTGCCCGTAGGTATG          | 236                 |
| <i>SYT1</i>      | GTGAGCGAGAGTCACCATGA          | ACGGTGGCAATGGAATTTTA          | 172                 |
| <i>SNAP25</i>    | ATGCCCCGAGAAAATGAAATG         | AGCATCTTTGTTGCACGTTG          | 190                 |
| <i>MBP</i>       | GGGAGGACAACACCTTCAAA          | ACTTGCTGTGGCCAGGTACT          | 155                 |
| <i>GRIA2</i>     | GTGGCTAGAGTGCGGAAGTC          | ACGCCTTGCTCACTGAGTTT          | 206                 |
| <i>KIF5C</i>     | TGCAGGATGCTGAAGAAATG          | GCTTCTCCTGTTCCAGTTGC          | 168                 |
| <i>STMN2</i>     | AGCTGTCCATGCTGTCACTG          | CAGCCTCCAGTTTCTTCTGG          | 231                 |
| <i>NEFM</i>      | TCAACGTCAAGATGGCTCTG          | CTTCCACCTTGGGTTTCTGA          | 165                 |
| <i>GABBR2</i>    | CGCCTGTTCTAGCCGATAAG          | GGTACAGGGATCGTTGGAGA          | 236                 |

**Primers used for kidney**

| <b>Gene name</b> | <b>forward primer (5'-3')</b> | <b>Reverse primer (3'-5')</b> | <b>Product size</b> |
|------------------|-------------------------------|-------------------------------|---------------------|
| <i>SLC12A1</i>   | TTTGGAGCTGTTTTGTGCTG          | ATGGGTCCCCCTGTTAAGAC          | 245                 |
| <i>SLC3A1</i>    | GGGAACAGCGTGTATGAGGT          | GGAGTTCCAGGGAGTGTGAA          | 167                 |
| <i>UMOD</i>      | AAGAGTCTGGGCTTCGACAA          | GCTGTAAGTGGCATGGGTTT          | 162                 |
| <i>AOC1</i>      | AGGCATGCAGACCAAGTACC          | GGCATTTCAAAGAGGCAGAG          | 171                 |
| <i>CD24</i>      | ACCCACGCAGATTTATTCCA          | ACCACGAAGAGACTGGCTGT          | 153                 |
| <i>HSD11B2</i>   | GACCTGACCAAACCAGGAGA          | GCCAAAGAAATTCACCTCCA          | 174                 |
| <i>CA12</i>      | AGTACAAAGGCCAGGAAGCA          | GCCGGAAGTTGTTGATCATT          | 246                 |
| <i>PDZK1IP1</i>  | TTGCAGTCAACCACTTCTGG          | GCATTCTCATGCTCACTGGA          | 151                 |
| <i>FXYD2</i>     | CGTGGACCCGTTCTACTATGA         | GGCTCATCTTCATTGATTTGC         | 153                 |
| <i>CDH16</i>     | GGGAAACCTCTACGTGACCA          | AGCTCAGGGATGCTGACTGT          | 189                 |
| <i>SLC22A8</i>   | CTGAGCACCGTCATCTTGAA          | GACCAACCAGCGTATGGACT          | 219                 |
| <i>CLDN8</i>     | GGGACAATGAGAAGGTGAA           | GAGCTCCTCCAACAATCAGC          | 217                 |
